# Supplementary material for: Increasing electron transporting properties and horizontal molecular orientation via meta-position of nitrogen for “(A)n–D–(A)n” structured terpyridine electron-transporting material
Source: Royal Society of Chemistry journal article supplement (doi:10.1039/c9tc03787j), 2019-01-01
Supplement: c9tc03787j1.pdf [file c9tc03787j1.pdf]

## Supplementary Information

### **To Increase Electron Transporting Properties and horizontal molecular orientation via a Meta-Position of Nitrogen for “(A)<sub>n</sub>-D-(A)<sub>n</sub>” Structured Terpyridine Electron-Transporting Material**

*Xuan Guo, Mengying Bian, Fang Lv, Yuanxun Wang, Zifeng Zhao, Zuqiang Bian, Bo Qu, Lixin Xiao\* and Zhijian Chen\**

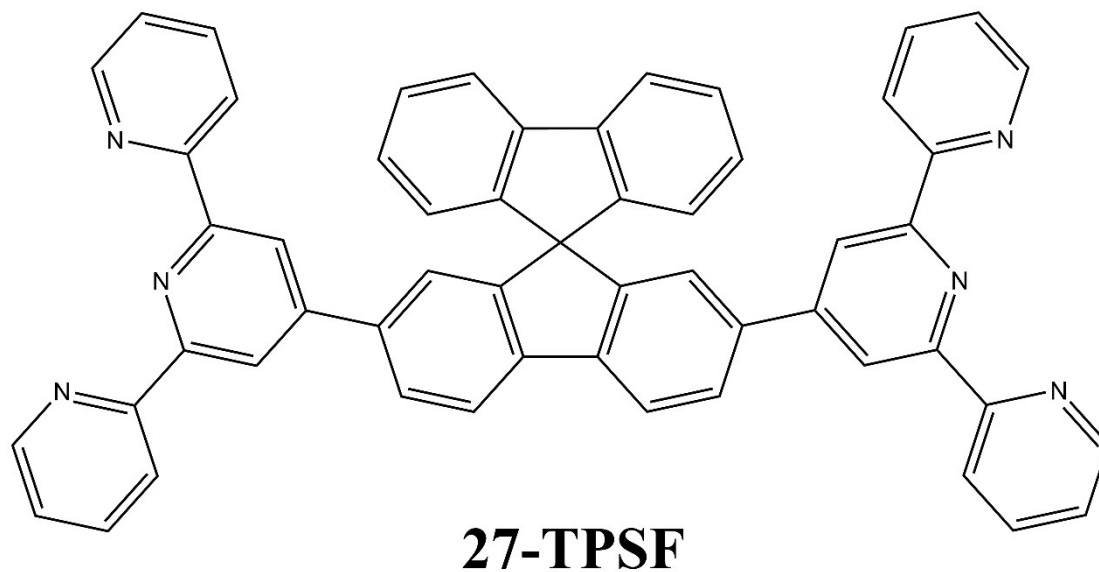

**Figure S1.** Chemical structure of 27-TPSF

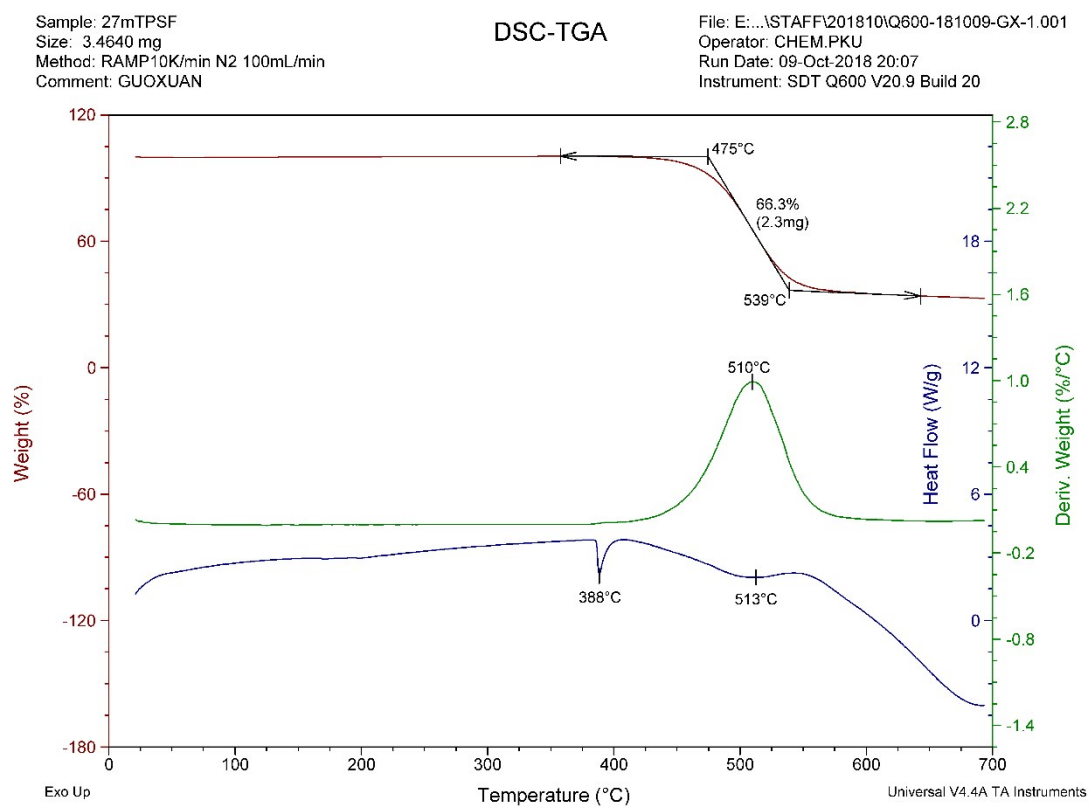

**Figure S2.** DSC-TGA plots of 27-mTPSF

Sample: 27mTPSF  
 Size: 3.6700 mg  
 Method: RAMP10K/MIN, N2 50ML/MIN  
 Comment: GUOXUAN

DSC

File: C:\TA\Data\201906\Q2000-190628-GX-2.001  
 Operator: CHEM.PKU  
 Run Date: 28-Jun-2019 10:35  
 Instrument: DSC Q2000 V24.10 Build 122

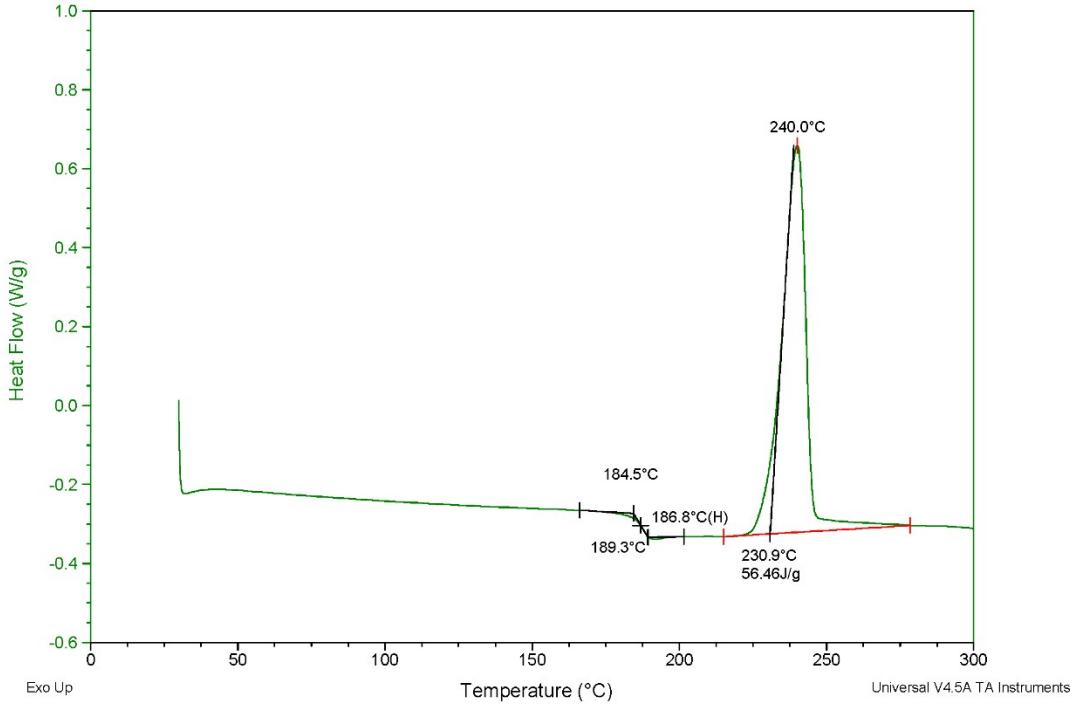

**Figure S3.** DSC plots of 27-mTPSF

### Single carrier devices

In order to compare the electron transport capabilities of 27-TPSF and 27-mTPSF. We used the space-charge-limited current (SCLC) method to estimate the values of electron mobilities of 27-TPSF and 27-mTPSF.<sup>1</sup> The current density-voltage curves were fitted using the equation:

$$J = \frac{9}{8} \varepsilon \varepsilon_0 \frac{E^2}{L} \mu_0 \exp\left(\frac{E}{\beta\sqrt{E}}\right) \quad (1)$$

$$\mu(E) = \mu_0 \exp\left(\frac{E}{\beta\sqrt{E}}\right) \quad (2)$$

where E is the electric field,  $\varepsilon$  and  $\varepsilon_0$  are the relative dielectric constant and the permittivity of the free space, respectively, and L is the thickness of the organic layer.

Then the electron mobilities were derived from Figure 4a. As shown in **Figure S4**, for the electric field at 0.8 MV/cm, the estimated electron mobility of 27-TPSF is  $1.0 \times 10^{-6} \text{ cm}^2/\text{V s}$  and the electron mobility of 27-mTPSF is  $3.3 \times 10^{-6} \text{ cm}^2/\text{V s}$ .

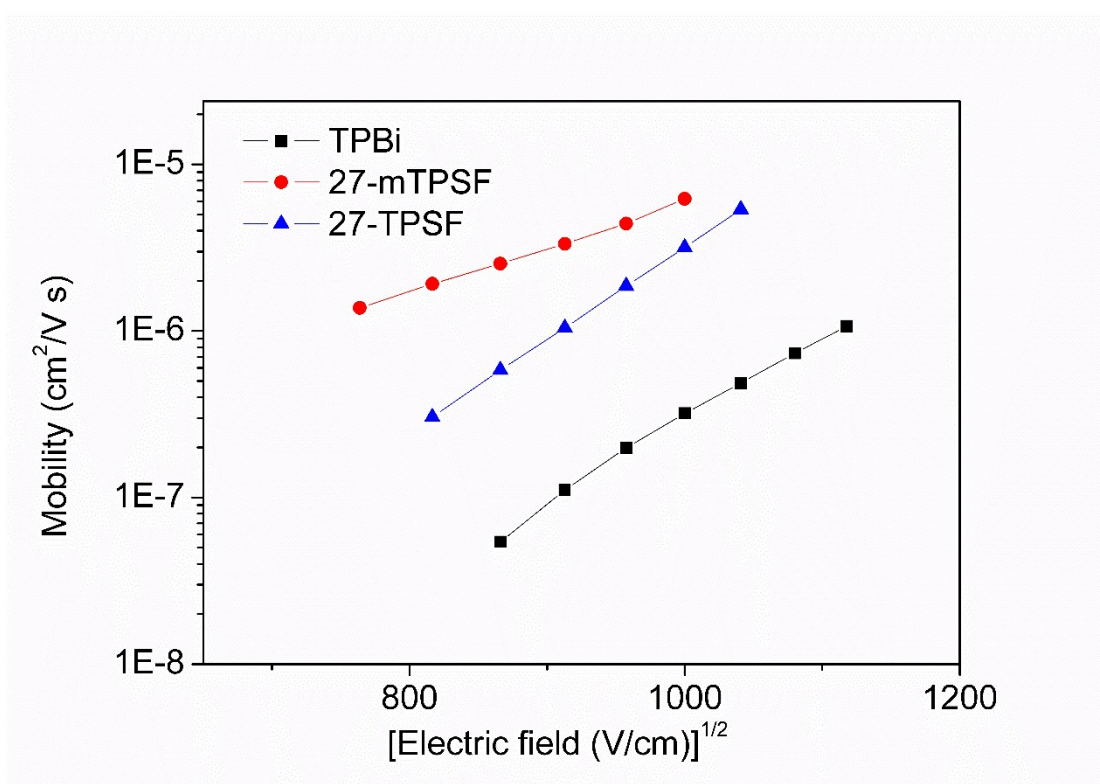

**Figure S4.** Mobility-[Electric field (V/cm)]<sup>1/2</sup> curves of electron-dominant devices: ITO/BCP (10 nm)/27-mTPSF or 27-TPSF or TPBi (30 nm)/LiF/Al.

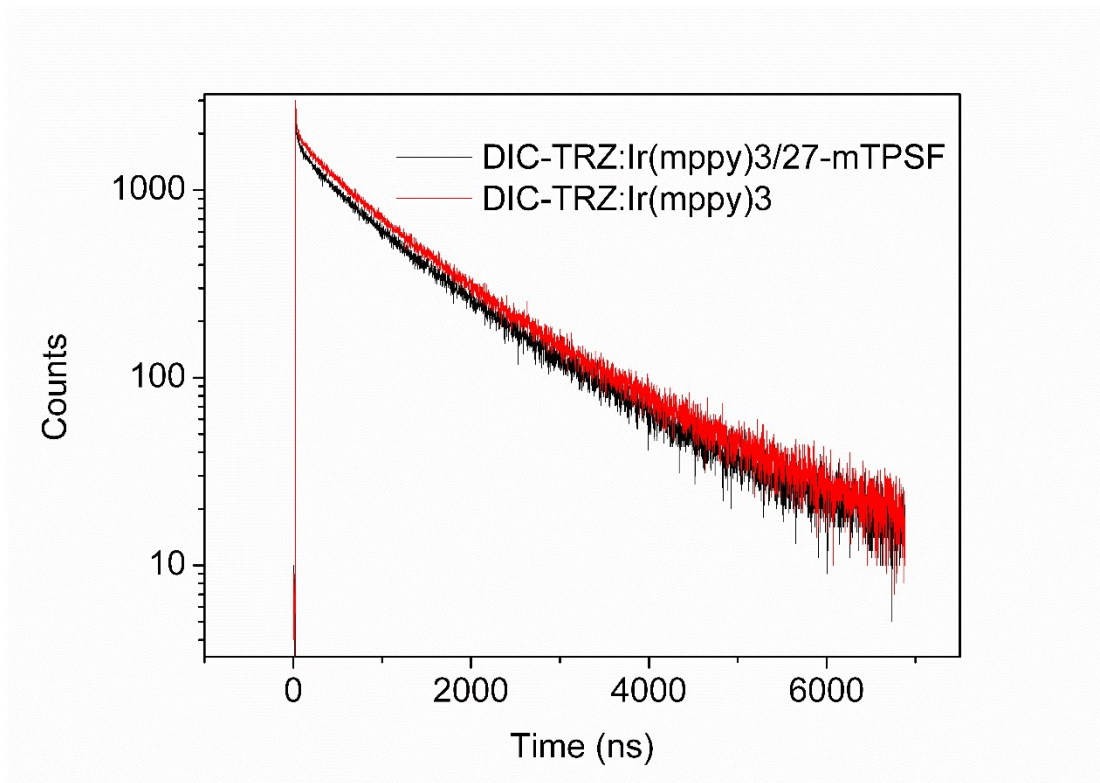

**Figure S5.** The transient decay curves of DIC-TRZ: Ir(mppy)3 (8 wt%, 30nm) and DIC-TRZ: Ir(mppy)3 (8 wt%, 30nm)/27-mTPSF(50nm) films.

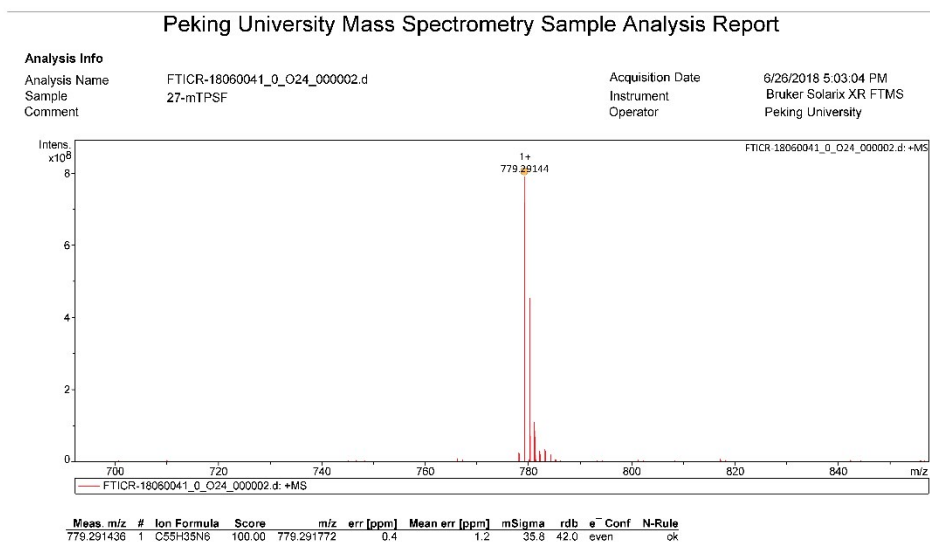

**Figure S6.** The mass spectrometry analysis of 27-mTPSF

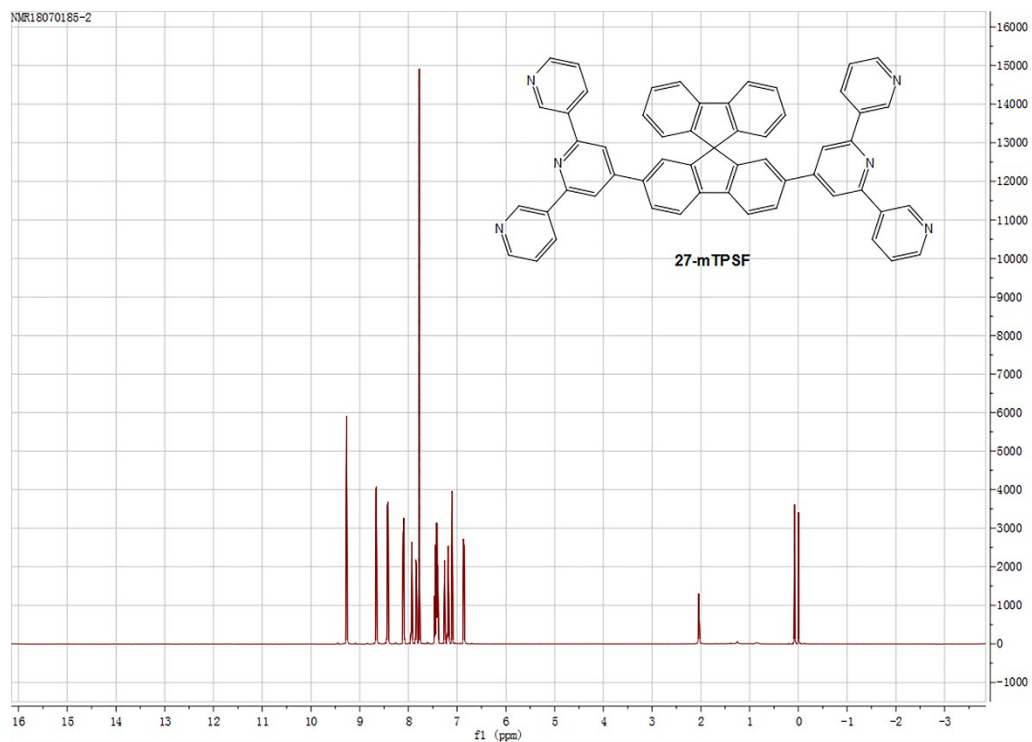

**Figure S7.** The <sup>1</sup>H NMR spectrum of 27-mTPSF

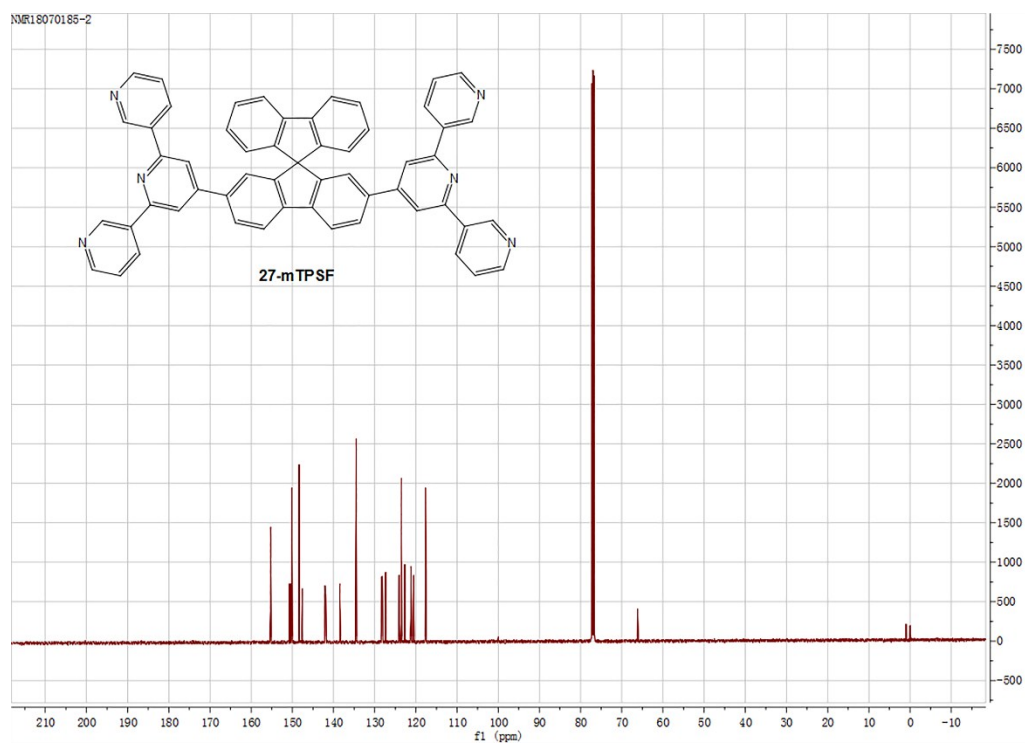

**Figure S8.** The <sup>13</sup>C NMR spectrum of 27-mTPSF

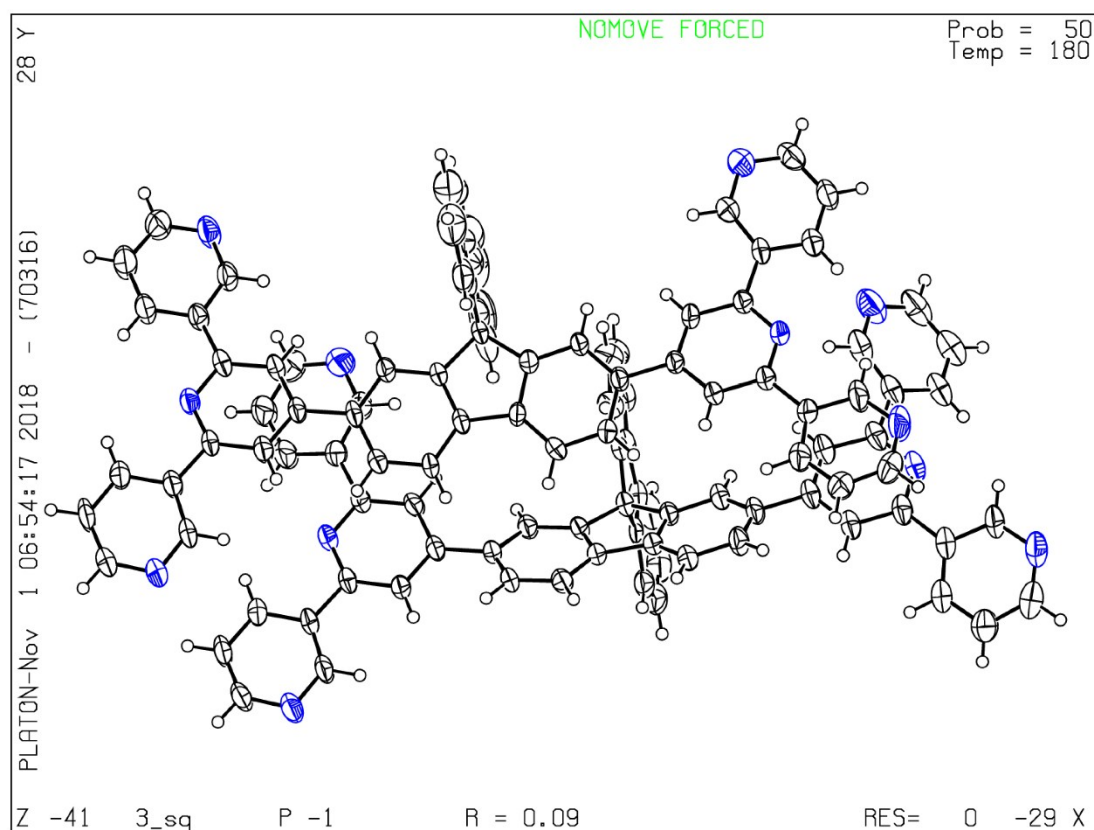

**Figure S9.** The single crystal structure of 27-mTPSF

**Table S1.** Summary of the crystal data for 27-mTPSF

|                                         |                                                 |                |                 |
|-----------------------------------------|-------------------------------------------------|----------------|-----------------|
| Parameter                               | 27-mTPSF                                        |                |                 |
| Bond precision: C-C = 0.0063 Å          | Wavelength=0.71073                              |                |                 |
| Cell                                    | a=12.1535(8)                                    | b=17.2039(13)  | c=21.2434(14)   |
|                                         | alpha=85.915(6)                                 | beta=82.611(5) | gamma=70.949(6) |
| Temperature                             | 180 K                                           |                |                 |
| Volume                                  | 4161.6(5)                                       |                |                 |
| Space group                             | P -1                                            |                |                 |
| Hall group                              | -P 1                                            |                |                 |
| Sum formula                             | C <sub>55</sub> H <sub>34</sub> N <sub>6</sub>  |                |                 |
| Mr                                      | 778.88                                          |                |                 |
| D <sub>x</sub> , g cm <sup>-3</sup>     | 1.243                                           |                |                 |
| Z                                       | 4                                               |                |                 |
| Mu (mm <sup>-1</sup> )                  | 0.074                                           |                |                 |
| F000                                    | 1624.0                                          |                |                 |
| h, k, l <sub>max</sub>                  | 14, 20, 25                                      |                |                 |
| Nref                                    | 14715                                           |                |                 |
| T <sub>min</sub> , T <sub>max</sub>     | 0.775, 1.000                                    |                |                 |
| Correction method= # Reported T Limits: | T <sub>min</sub> =0.775 T <sub>max</sub> =1.000 |                |                 |

---

|                               |                                  |
|-------------------------------|----------------------------------|
| AbsCorr = MULTI-SCAN          |                                  |
| Data completeness = 0.999     | Theta(max)= 25.027               |
| R(reflections)= 0.0869( 7748) | wR2(reflections)= 0.1973( 14715) |
| S = 1.035                     | Npar= 1099                       |

## References

1. M. A. Khan, W. Xu, H. Khizar ul, Y. Bai, X. Y. Jiang, Z. L. Zhang, W. Q. Zhu, Z. L. Zhang and W. Q. Zhu, *Journal of Applied Physics*, 2008, **103**, 014509.
